# Supplementary material for: Long-Term Effect of Pravastatin on Carotid Intima–Media Complex Thickness: The J-STARS Echo Study (Japan Statin Treatment Against Recurrent Stroke)
Source: PubMed Central journal article supplement — Stroke. 2017 Nov 30;49(1):107–13. doi: 10.1161/STROKEAHA.117.018387 (PMC5753816; doi:10.1161/strokeaha.117.018387), 2017-11-30

## ONLINE SUPPLEMENT

### **Long-term effect of pravastatin on carotid intima-media complex thickness: the Japan Statin Treatment Against Recurrent Stroke (J-STARS) Echo Study**

Masatoshi Koga, MD<sup>1</sup>; Kazunori Toyoda, MD<sup>1</sup>; Kazuo Minematsu, MD<sup>1</sup>;  
Masahiro Yasaka, MD<sup>2</sup>; Yoji Nagai, MD<sup>3</sup>; Shiro Aoki, MD<sup>4</sup>; Tomohisa Nezu, MD<sup>4</sup>;  
Naohisa Hosomi, MD<sup>4</sup>; Tatsuo Kagimura, PhD<sup>5</sup>; Hideki Origasa, PhD<sup>6</sup>;  
Kenji Kamiyama, MD<sup>7</sup>; Rieko Suzuki, MD<sup>1</sup>; Toshiho Ohtsuki, MD<sup>4,8</sup>;  
Hirofumi Maruyama, MD<sup>4</sup>; Kazuo Kitagawa, MD<sup>9</sup>; Shinichiro Uchiyama, MD<sup>10</sup>;  
Masayasu Matsumoto, MD<sup>4, 11</sup>; on behalf of the J-STARS Investigators

1. Department of Cerebrovascular Medicine, National Cerebral and Cardiovascular Center, Suita, Osaka
2. Department of Cerebrovascular Medicine and Neurology, National Hospital Organization Kyushu Medical Center, Fukuoka
3. Clinical & Translational Research Center, Kobe University Hospital, Kobe
4. Department of Clinical Neuroscience and Therapeutics, Hiroshima University Graduate School of Biomedical and Health Sciences, Hiroshima
5. Foundation for Biomedical Research and Innovation, Translational Research Informatics Center, Kobe
6. Division of Biostatistics and Clinical Epidemiology, University of Toyama Graduate School of Medicine and Pharmaceutical Sciences, Toyama
7. Department of Neurosurgery and Stroke Center, Nakamura Memorial Hospital, Sapporo
8. Stroke Center, Kinki University, Osakasayama
9. Department of Neurology, Tokyo Women's Medical University, Tokyo
10. Clinical Research Center, International University of Health and Welfare, Center for Brain and Cerebral Vessels, Sanno Hospital and Sanno Medical Center, Tokyo
11. Japan Community Healthcare Organization (JCHO) Hoshigaoka Medical Center, Osaka, Japan

## **SUPPLEMENTARY TABLE I: Trial Offices**

---

The office of the J-STARS Echo Study: Department of Cerebrovascular Medicine, National Cerebral and Cardiovascular Center

Kazuo Minematsu (chief investigator of the J-STARS Echo Study)

Masahiro Yasaka, Kazunori Toyoda, Rieko Suzuki, Masatoshi Koga, Shinichi Wada, Shoko Kamiyoshi, Kie Yamaguchi

The J-STARS central office: Department of Clinical Neuroscience and Therapeutics, Hiroshima University Graduate School of Biomedical and Health Sciences

Masayasu Matsumoto (principal investigator)

Tatsuo Kohriyama, Takemori Yamawaki, Toshiho Ohtsuki, Hiroshi Yamashita, Eiichi Nomura, Naohisa Hosomi, Kayoko Ishihara, Shiro Aoki, Tomohisa Nezu, Hisami Hashida, Yuki Kimura, Hitomi Takahashi, Hiromi Sumida, Chisato Masuda, Eri Kashima, Shiho Kamimoto, Kazuko Kojo

---

## **SUPPLEMENTARY TABLE II: Inclusion and Exclusion Criteria**

---

### **Inclusion criteria**

1. Age between 45 and 80 years of either sex
2. Clinical diagnosis of noncardioembolic ischemic stroke developing within the preceding month to 3 years
3. Serum total cholesterol maintained between 4.65 and 6.21 mmol/L (180 and 240 mg/dL) without use of statins at enrollment
4. Written consent to participate in both the J-STARS Study and J-STARS Echo Study

### **Exclusion criteria**

1. Ischemic stroke of determined rare etiology, (e.g., vertebral artery dissection, fibromuscular dysplasia, and Moyamoya disease) or associated with catheterization or surgery
2. Co-existing coronary artery disease that needs treatment with statins
3. Hemorrhagic diathesis
4. Coagulopathy
5. Hemorrhagic diseases (e.g., intracerebral hemorrhage, subarachnoid hemorrhage, and active peptic ulcer)
6. Thrombocytopenia (platelet count  $\leq 100\ 000/\text{mm}^3$ )
7. Hepatic dysfunction (aspartate transaminase or alanine transaminase  $\geq 100$  IU/L)
8. Renal dysfunction (serum creatinine  $\geq 2.0$  mg/dL)
9. Scheduled surgery
10. Patients for whom carotid ultrasound would be technically problematic because of cervical tumor, torticollis, or others
11. Patients who underwent carotid endarterectomy or cervical radiotherapy

---

#1 to 3 of the inclusion criteria and #1 to 9 of the exclusion criteria are specific to the J-STARS Study.

**SUPPLEMENTARY TABLE III. Baseline Characteristics and Lipid Profiles**

|                                       | Pravastatin group<br>(n=388) | Control group<br>(n=405) | p value |
|---------------------------------------|------------------------------|--------------------------|---------|
| Women, n (%)                          | 133 (34.3)                   | 130 (32.1)               | 0.52    |
| Age, years                            | 66.4±8.2                     | 66.4±8.4                 | 0.96    |
| Hypertension, n (%)                   | 294 (75.8)                   | 321 (79.3)               | 0.24    |
| Diabetes mellitus, n (%)              | 89 (22.9)                    | 107 (26.4)               | 0.26    |
| History of coronary disease, n (%)    | 15 (3.9)                     | 20 (4.9)                 | 0.46    |
| Current and past smoking habit, n (%) | 201 (51.8)                   | 218 (53.8)               | 0.52    |
| Small infarct size* on MRI or CT      | 302 (77.8)                   | 297 (73.3)               | 0.22    |
| Body weight, kg                       | 60.8±9.8                     | 60.5±10.0                | 0.64    |
| Body mass index, kg/m <sup>2</sup>    | 23.8±2.9                     | 23.7±3.0                 | 0.49    |
| Duration after stroke onset, months   | 9.6±10.0                     | 9.8±10.0                 | 0.88    |
| Initial NIHSS score, median (range)   | 0 (0-19)                     | 1 (0-17)                 | 0.019   |
| Stroke subtype                        |                              |                          |         |
| Atherothrombotic infarction, n (%)    | 93 (24.0)                    | 102 (25.2)               | 1.00    |
| Lacunar infarction, n (%)             | 251 (64.7)                   | 275 (67.9)               |         |
| Others, n (%)                         | 44 (11.3)                    | 28 (6.9)                 |         |
| Laboratory data                       |                              |                          |         |
| Total cholesterol, mmol/L             | 5.48±0.67                    | 5.41±0.66                | 0.18    |
| LDL cholesterol, mmol/L               | 3.39±0.66                    | 3.37±0.63                | 0.74    |
| Triglycerides, mmol/L                 | 1.58±0.80                    | 1.61±0.80                | 0.54    |
| HDL cholesterol, mmol/L               | 1.39±0.42                    | 1.35±0.38                | 0.17    |

NIHSS, National Institutes of Health Stroke Scale; LDL, low-density lipoprotein; HDL, high-density lipoprotein; \* <1.5 cm in diameter

Data are represented as mean ± standard deviation unless otherwise stated

**SUPPLEMENTARY TABLE IV. Temporal trends of mean intima-media complex thickness change by allocated groups**

| Index              | Group             |                          | Follow-up timing         |                           |                           |                           |                           |                           |                           |
|--------------------|-------------------|--------------------------|--------------------------|---------------------------|---------------------------|---------------------------|---------------------------|---------------------------|---------------------------|
|                    |                   |                          | Baseline                 | 1 year                    | 2 years                   | 3 years                   | 4 years                   | 5 years                   |                           |
| Mean IMT           | Pravastatin       | N                        | 388                      | 336                       | 305                       | 268                       | 251                       | 255                       |                           |
|                    |                   | Mean (SD)                | 0.8871<br>(0.1546)       | 0.9024<br>(0.1675)        | 0.9138<br>(0.1751)        | 0.9057<br>(0.1714)        | 0.9051<br>(0.1738)        | 0.9066<br>(0.1729)        |                           |
|                    |                   | Median (min, max)        | 0.8742<br>(0.535, 1.647) | 0.8763<br>(0.551, 1.592)  | 0.8901<br>(0.600, 2.055)  | 0.8815<br>(0.574, 1.793)  | 0.8787<br>(0.635, 1.857)  | 0.8819<br>(0.612, 1.962)  |                           |
|                    |                   | Control                  | N                        | 405                       | 346                       | 318                       | 281                       | 261                       | 265                       |
|                    |                   | Mean (SD)                | 0.8870<br>(0.1515)       | 0.8980<br>(0.1635)        | 0.9116<br>(0.1691)        | 0.8972<br>(0.1468)        | 0.9141<br>(0.1692)        | 0.9280<br>(0.1828)        |                           |
|                    | Median (min, max) | 0.8739<br>(0.605, 1.811) | 0.8697<br>(0.598, 2.032) | 0.8765<br>(0.642, 1.727)  | 0.8793<br>(0.621, 1.793)  | 0.8811<br>(0.644, 2.048)  | 0.8906<br>(0.642, 2.019)  |                           |                           |
|                    | Mean IMT change   | Pravastatin              | Mean (SD)                | -                         | 0.0112<br>(0.0848)        | 0.0231<br>(0.1143)        | 0.0168<br>(0.1137)        | 0.0181<br>(0.1176)        | 0.0207<br>(0.1163)        |
|                    |                   |                          | Median (min, max)        | -                         | 0.0024<br>(-0.254, 0.563) | 0.0176<br>(-0.477, 0.890) | 0.0063<br>(-0.252, 0.631) | 0.0094<br>(-0.360, 0.688) | 0.0146<br>(-0.236, 0.797) |
|                    |                   |                          | Adjusted mean (SE)       | -                         | 0.01 (0.00)               | 0.02 (0.01)               | 0.02 (0.01)               | 0.02 (0.01)               | 0.02 (0.01)               |
|                    |                   |                          | Control                  | Mean (SD)                 | -                         | 0.0084<br>(0.0741)        | 0.0197<br>(0.0868)        | 0.0174<br>(0.0966)        | 0.0299<br>(0.1129)        |
| Median (min, max)  |                   |                          | -                        | 0.0098<br>(-0.423, 0.257) | 0.0185<br>(-0.250, 0.423) | 0.0125<br>(-0.283, 0.587) | 0.0185<br>(-0.400, 0.759) | 0.0337<br>(-0.254, 0.834) |                           |
| Adjusted mean (SE) | -                 | 0.01 (0.00)              | 0.02 (0.00)              | 0.02 (0.01)               | 0.03 (0.01)               | 0.04 (0.01)               |                           |                           |                           |
|                    |                   | p*                       | -                        | 0.74                      | 0.99                      | 0.44                      | 0.18                      | 0.010                     |                           |

\*Wilcoxon rank-sum test

IMT, intima-media complex thickness

**SUPPLEMENTARY TABLE V. Incidence of stroke and TIA by allocated groups**

|                             | Event rate, %/year |         | Adjusted hazard ratio | 95% confidence interval |
|-----------------------------|--------------------|---------|-----------------------|-------------------------|
|                             | Pravastatin        | Control |                       |                         |
| Total stroke and TIA        | 2.58               | 2.89    | 0.91                  | 0.61 to 1.35            |
| Total stroke                | 2.27               | 2.66    | 0.87                  | 0.58 to 1.33            |
| Ischemic stroke             | 2.09               | 2.33    | 0.92                  | 0.59 to 1.42            |
| Atherothrombotic infarction | 0.27               | 0.71    | 0.41                  | 0.15 to 1.15            |
| Lacunar infarction          | 1.20               | 1.14    | 1.07                  | 0.59 to 1.93            |

Hazard ratios are adjusted for the stratification factors at randomization in the main J-STARS trial: i.e., stroke subtype (atherothrombotic infarction vs. others), high blood pressure ( $\geq 150/90$  mm Hg vs. not), and diabetes mellitus (absence vs. presence).

**SUPPLEMENTARY TABLE VI. Comparisons of baseline characteristics and lipid profiles between patients in the intention-to-treatment analyses and the remaining patients in the main J-STARS trial**

|                                       | Patients in the<br>intention-to-treatment<br>analyses (n=793) | The remaining<br>patients in the main<br>J-STARS trial<br>(n=785) | p value |
|---------------------------------------|---------------------------------------------------------------|-------------------------------------------------------------------|---------|
| Women, n (%)                          | 263 (33.2)                                                    | 228 (29.0)                                                        | 0.077   |
| Age, years                            | 66.4±8.3                                                      | 66.0±8.6                                                          | 0.32    |
| Hypertension, n (%)                   | 615 (77.6)                                                    | 585 (74.5)                                                        | 0.16    |
| Diabetes mellitus, n (%)              | 196 (24.7)                                                    | 173 (22.0)                                                        | 0.21    |
| History of coronary disease, n (%)    | 35 (4.4)                                                      | 46 (5.9)                                                          | 0.17    |
| Current and past smoking habit, n (%) | 429 (52.8)                                                    | 427 (54.4)                                                        | 0.31    |
| Small infarct size* on MRI or CT      | 599 (75.5)                                                    | 573 (73.0)                                                        | 0.16    |
| Body weight, kg                       | 60.6±9.9                                                      | 61.6±10.3                                                         | 0.070   |
| Body mass index, kg/m <sup>2</sup>    | 23.7±3.0                                                      | 23.7±3.2                                                          | 0.95    |
| Duration after stroke onset, months   | 9.7±10.0                                                      | 9.6±10.2                                                          | 0.78    |
| Initial NIHSS score, median (range)   | 1 (0-19)                                                      | 1 (0-17)                                                          | 0.052   |
| Stroke subtype                        |                                                               |                                                                   |         |
| Atherothrombotic infarction, n (%)    | 195 (24.6)                                                    | 206 (26.2)                                                        | 0.22    |
| Lacunar infarction, n (%)             | 502 (63.3)                                                    | 504 (64.2)                                                        |         |
| Others, n (%)                         | 96 (12.1)                                                     | 75 (9.6)                                                          |         |
| Laboratory data                       |                                                               |                                                                   |         |
| Total cholesterol, mmol/L             | 5.44±0.66                                                     | 5.42±0.60                                                         | 0.47    |
| LDL cholesterol, mmol/L               | 3.38±0.64                                                     | 3.32±0.62                                                         | 0.055   |
| Triglycerides, mmol/L                 | 1.59±0.80                                                     | 1.62±0.87                                                         | 0.63    |
| HDL cholesterol, mmol/L               | 1.37±0.40                                                     | 1.39±0.41                                                         | 0.23    |

NIHSS, National Institutes of Health Stroke Scale; LDL, low-density lipoprotein; HDL, high-density lipoprotein; \* <1.5 cm in diameter

Data are represented as mean ± standard deviation unless otherwise stated

**SUPPLEMENTARY TABLE VII. Temporal trends of mean intima-media complex thickness change by allocated groups using only patients with carotid ultrasonography examination at 5 years**

| Index              | Group       |                      | Follow-up timing         |                           |                           |                           |                           |                           |
|--------------------|-------------|----------------------|--------------------------|---------------------------|---------------------------|---------------------------|---------------------------|---------------------------|
|                    |             |                      | Baseline                 | 1 year                    | 2 years                   | 3 years                   | 4 years                   | 5 years                   |
| Mean IMT           | Pravastatin | N                    | 255                      | 240                       | 235                       | 221                       | 227                       | 255                       |
|                    |             | Mean (SD)            | 0.8859<br>(0.1602)       | 0.8990<br>(0.1731)        | 0.9104<br>(0.1825)        | 0.9016<br>(0.1744)        | 0.9035<br>(0.1782)        | 0.9066<br>(0.1729)        |
|                    |             | Median<br>(min, max) | 0.8670<br>(0.570, 1.647) | 0.8656<br>(0.551, 1.592)  | 0.8857<br>(0.600, 2.055)  | 0.8787<br>(0.574, 1.793)  | 0.8737<br>(0.635, 1.857)  | 0.8819<br>(0.612, 1.962)  |
|                    | Control     | N                    | 265                      | 238                       | 238                       | 224                       | 230                       | 265                       |
|                    |             | Mean (SD)            | 0.8878<br>(0.1460)       | 0.8948<br>(0.1562)        | 0.9061<br>(0.1663)        | 0.8945<br>(0.1552)        | 0.9146<br>(0.1735)        | 0.9280<br>(0.1828)        |
|                    |             | Median<br>(min, max) | 0.8752<br>(0.605, 1.461) | 0.8605<br>(0.644, 1.579)  | 0.8757<br>(0.642, 1.558)  | 0.8790<br>(0.621, 1.793)  | 0.8840<br>(0.644, 2.048)  | 0.8906<br>(0.642, 2.019)  |
| Mean IMT<br>change | Pravastatin | Mean (SD)            | -                        | 0.0107<br>(0.0877)        | 0.0217<br>(0.1204)        | 0.0156<br>(0.1158)        | 0.0194<br>(0.1206)        | 0.0207<br>(0.1163)        |
|                    |             | Median<br>(min, max) | -                        | 0.0022<br>(-0.254, 0.563) | 0.0108<br>(-0.477, 0.890) | 0.0083<br>(-0.252, 0.631) | 0.0101<br>(-0.360, 0.688) | 0.0146<br>(-0.236, 0.797) |
|                    |             | Adjusted mean (SE)   | -                        | 0.01 (0.01)               | 0.02 (0.01)               | 0.02 (0.01)               | 0.02 (0.01)               | 0.02 (0.01)               |
|                    | Control     | Mean (SD)            | -                        | 0.0067<br>(0.0770)        | 0.0177<br>(0.0921)        | 0.0120<br>(0.0979)        | 0.0298<br>(0.1167)        | 0.0403<br>(0.1182)        |
|                    |             | Median<br>(min, max) | -                        | 0.0081<br>(-0.423, 0.243) | 0.0174<br>(-0.250, 0.423) | 0.0085<br>(-0.283, 0.587) | 0.0188<br>(-0.400, 0.759) | 0.0337<br>(-0.254, 0.834) |
|                    |             | Adjusted mean (SE)   | -                        | 0.01 (0.00)               | 0.02 (0.01)               | 0.02 (0.01)               | 0.03 (0.01)               | 0.04 (0.01)               |
|                    |             | p*                   | -                        | 0.80                      | 0.98                      | 0.87                      | 0.29                      | 0.010                     |

\*Wilcoxon rank-sum test

IMT, intima-media complex thickness



**SUPPLEMENTARY TABLE VIII. Comparisons of baseline characteristics and lipid profiles between patients in the intention-to-treatment analyses and those without initial echographic data**

|                                       | Patients in the<br>intention-to-treatment<br>analyses (n=793) | Patients without<br>initial echographic<br>data (n=71) | p value |
|---------------------------------------|---------------------------------------------------------------|--------------------------------------------------------|---------|
| Women, n (%)                          | 263 (33.2)                                                    | 15 (21.1)                                              | 0.038   |
| Age, years                            | 66.4±8.3                                                      | 65.4±7.8                                               | 0.29    |
| Hypertension, n (%)                   | 615 (77.6)                                                    | 52 (73.2)                                              | 0.41    |
| Diabetes mellitus, n (%)              | 196 (24.7)                                                    | 13 (18.3)                                              | 0.23    |
| History of coronary disease, n (%)    | 35 (4.4)                                                      | 9 (12.7)                                               | <0.01   |
| Current and past smoking habit, n (%) | 419 (52.8)                                                    | 39 (54.9)                                              | 0.42    |
| Small infarct size* on MRI or CT      | 599 (75.5)                                                    | 40 (56.3)                                              | <0.01   |
| Body weight, kg                       | 60.6±9.9                                                      | 63.7±9.6                                               | 0.017   |
| Body mass index, kg/m <sup>2</sup>    | 23.7±3.0                                                      | 24.2±2.9                                               | 0.20    |
| Duration after stroke onset, months   | 9.7±10.0                                                      | 10.9±11.3                                              | 0.34    |
| Initial NIHSS score, median (range)   | 1 (0-19)                                                      | 0 (0-8)                                                | 0.42    |
| Stroke subtype                        |                                                               |                                                        |         |
| Atherothrombotic infarction, n (%)    | 195 (24.6)                                                    | 29 (40.8)                                              | <0.01   |
| Lacunar infarction, n (%)             | 526 (66.3)                                                    | 32 (45.1)                                              |         |
| Others, n (%)                         | 72 (9.1)                                                      | 10 (14.1)                                              |         |
| Laboratory data                       |                                                               |                                                        |         |
| Total cholesterol, mmol/L             | 5.44±0.66                                                     | 5.46±0.79                                              | 0.87    |
| LDL cholesterol, mmol/L               | 3.38±0.64                                                     | 3.29±0.66                                              | 0.29    |
| Triglycerides, mmol/L                 | 1.59±0.80                                                     | 1.82±1.45                                              | 0.043   |
| HDL cholesterol, mmol/L               | 1.37±0.40                                                     | 1.33±0.32                                              | 0.42    |

NIHSS, National Institutes of Health Stroke Scale; LDL, low-density lipoprotein; HDL, high-density lipoprotein; \* <1.5 cm in diameter

Data are represented as mean ± standard deviation unless otherwise stated

**SUPPLEMENTARY TABLE IX. Comparisons of baseline characteristics and lipid profiles between patients with and without follow-up at 5 years**

|                                       | Patients with<br>follow-up at 5 years<br>(n=520) | Patients without<br>follow-up at 5 years<br>(n=344) | p value |
|---------------------------------------|--------------------------------------------------|-----------------------------------------------------|---------|
| Women, n (%)                          | 171 (32.9)                                       | 107 (31.1)                                          | 0.58    |
| Age, years                            | 66.0±8.2                                         | 66.9±8.3                                            | 0.11    |
| Hypertension, n (%)                   | 401 (77.1)                                       | 266 (77.3)                                          | 0.94    |
| Diabetes mellitus, n (%)              | 115 (22.1)                                       | 94 (27.3)                                           | 0.08    |
| History of coronary disease, n (%)    | 22 (4.2)                                         | 22 (6.4)                                            | 0.15    |
| Current and past smoking habit, n (%) | 266 (51.2)                                       | 192 (55.8)                                          | 0.10    |
| Small infarct size* on MRI or CT      | 398 (76.5)                                       | 241 (70.1)                                          | 0.090   |
| Body weight, kg                       | 61.1±9.6                                         | 60.6±10.3                                           | 0.49    |
| Body mass index, kg/m <sup>2</sup>    | 23.8±2.9                                         | 23.7±3.0                                            | 0.60    |
| Duration after stroke onset, months   | 9.9±10.1                                         | 9.7±10.2                                            | 0.74    |
| Initial NIHSS score, median (range)   | 1 (0-14)                                         | 0 (0-19)                                            | 0.72    |
| Stroke subtype                        |                                                  |                                                     |         |
| Atherothrombotic infarction, n (%)    | 128 (24.6)                                       | 96 (27.9)                                           | 0.12    |
| Lacunar infarction, n (%)             | 352 (67.7)                                       | 206 (59.9)                                          |         |
| Others, n (%)                         | 40 (7.7)                                         | 42 (12.2)                                           |         |
| Laboratory data                       |                                                  |                                                     |         |
| Total cholesterol, mmol/L             | 5.46±0.63                                        | 5.42±0.73                                           | 0.41    |
| LDL cholesterol, mmol/L               | 3.39±0.63                                        | 3.34±0.68                                           | 0.28    |
| Triglycerides, mmol/L                 | 1.60±0.82                                        | 1.64±0.94                                           | 0.51    |
| HDL cholesterol, mmol/L               | 1.39±0.42                                        | 1.34±0.35                                           | 0.084   |

NIHSS, National Institutes of Health Stroke Scale; LDL, low-density lipoprotein; HDL, high-density lipoprotein; \* <1.5 cm in diameter

Data are represented as mean ± standard deviation unless otherwise stated

## **SUPPLEMENTARY FIGURE legends**

SUPPLEMENTARY FIGURE I. The association between the change of intima-media complex thickness and the change of low-density lipoprotein (LDL) cholesterol level at 5 years in the pravastatin group (closed circle) and in the control group (open circle) is shown by a scattered plot.

SUPPLEMENTARY FIGURE II. The association between the change of intima-media complex thickness and the change of low-density lipoprotein (LDL) cholesterol level to high density lipoprotein (HDL) cholesterol level at 5 years in the pravastatin group (closed circle) and in the control group (open circle) is shown by a scattered plot.

SUPPLEMENTARY FIGURES III. The association between the change of intima-media complex thickness and the change of log-transformed C-reactive protein level at 5 years in the pravastatin group (closed circle) and in the control group (open circle) is shown by a scattered plot.

**SUPPLEMENTARY FIGURE I. A scattered plot showing the association between the change of intima-media complex thickness and the change of low density lipoprotein cholesterol level**

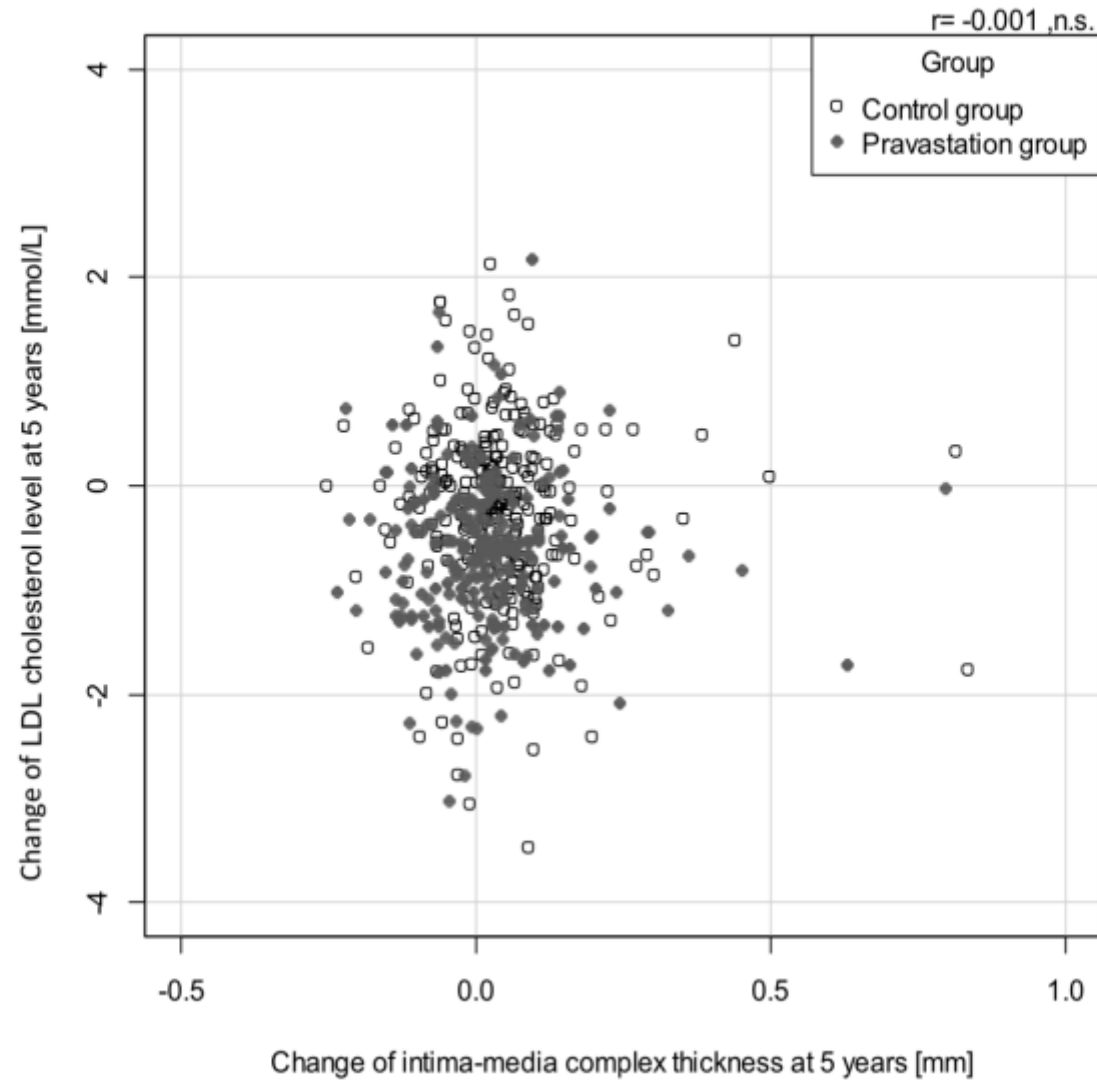

**SUPPLEMENTARY FIGURE II. A scattered plot showing the association between the change of intima-media complex thickness and the change of low density lipoprotein cholesterol level to high density lipoprotein cholesterol level ratio**

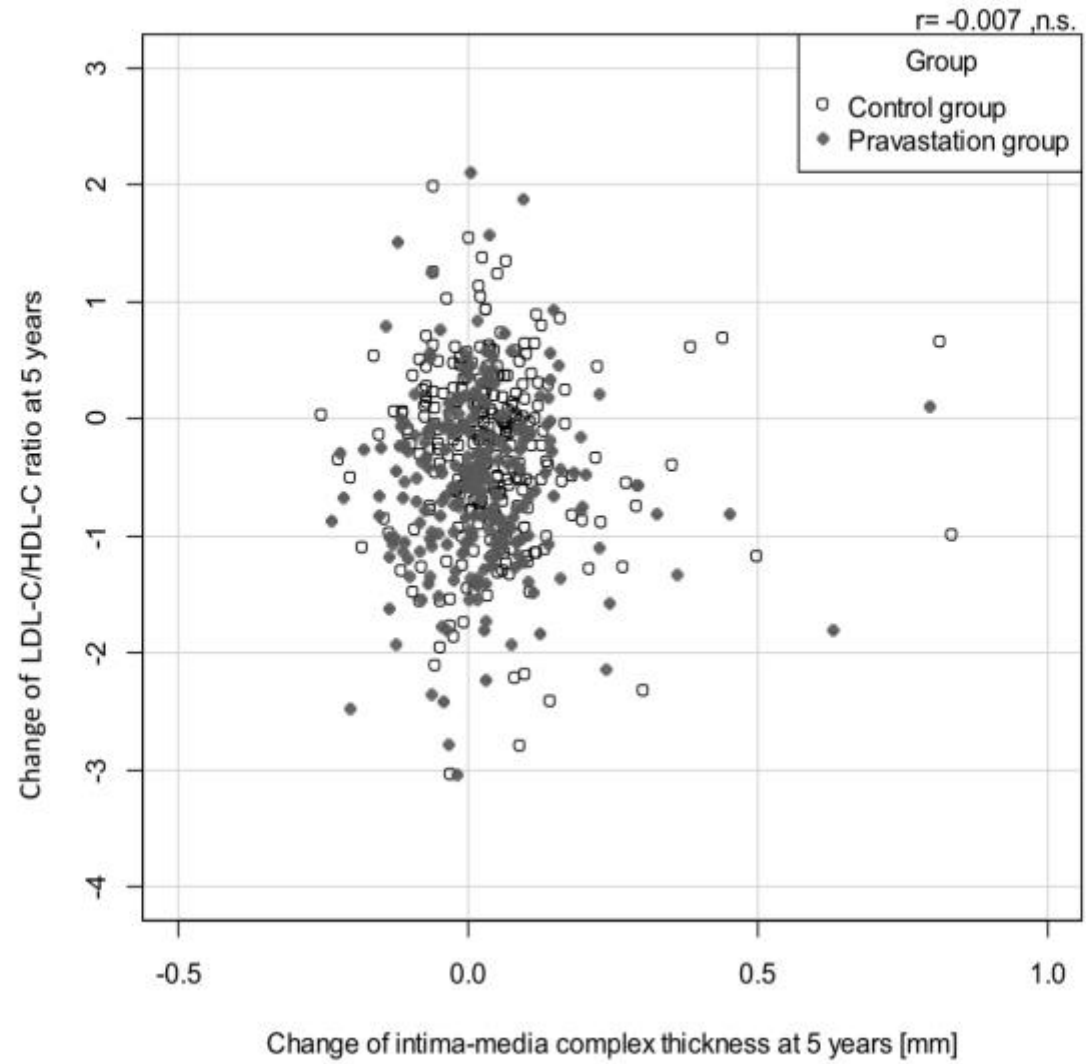

**SUPPLEMENTARY FIGURE III. A scattered plot showing the association between the change of intima-media complex thickness and the change of high-sensitivity C-reactive protein level**

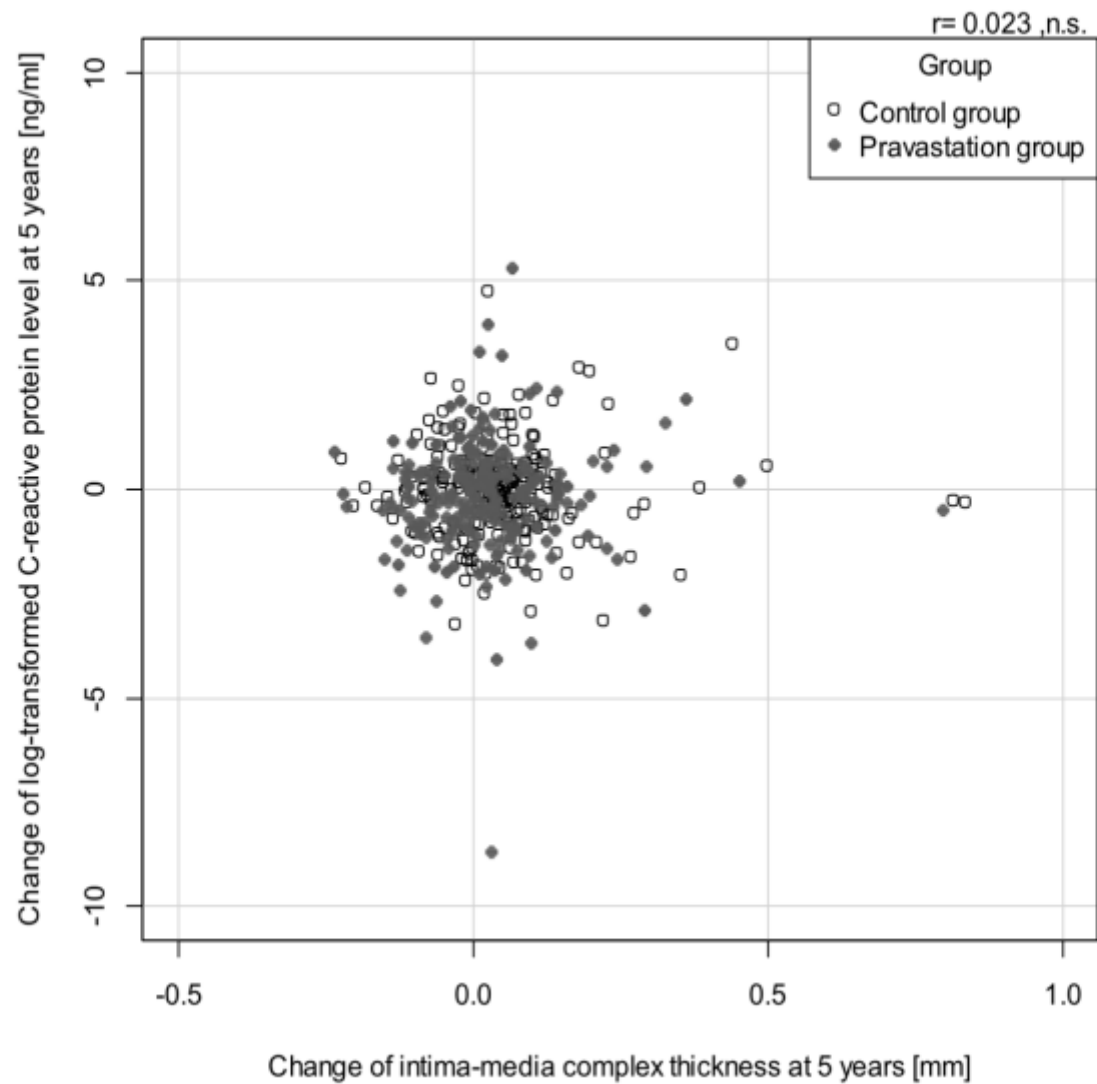

Supplement: str-49-107-s001.pdf [file str-49-107-s001.pdf]
